## Volume 3 Winter Issue

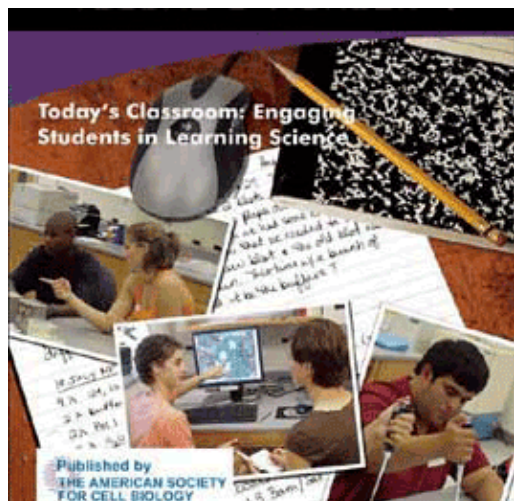

### Table of Contents

Use Arrows to Browse  
Previous Issues

#### Contact CBE

8120 Woodmont Avenue Suite  
750

Bethesda, Maryland 20814-  
2762

Phone: (301) 347-9300

Fax: (301) 347-9350

cbe@ascb.org

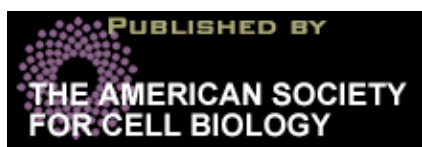

Editorial Board Member Login

## FEATURES

- **Approaches to Biology Teaching and Learning: Learning Styles and the Problem of Instructional Selection—Engaging All Students in Science Courses**  
by Kimberly Tanner and Deborah Allen
- **Points of View: Lectures: Can't Learn With Them, Can't Learn Without Them**  
by Harvey F. Lodish and Roberto K. Rodriguez; Daniel J. Klionsky
- **From the National Academies: The Challenges and Opportunities for Improving Undergraduate Science Education through Introductory Courses**  
by Jay B. Labov
- **Meeting Report: The 2004 National Academies Summer Institute on Undergraduate Education in Biology**  
by William B. Wood and Jo Handelsman
- **Video Views and Reviews: Creating a Thread with Respect to the Invasion of Animal Viruses**  
by Christopher Watters
- **WWW.Cell Biology Education**  
by Robert V. Blystone
- **Exploring Cells**  
Review of: *The World of the Cell*, 5th ed., by W.M. Becker, L.J. Kleinsmith, and J. Hardin; 2003; 802 pp.; Benjamin Cummings (San Francisco);

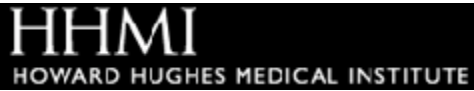

Supported in part by an Undergraduate Science Education Program grant from the Howard Hughes Medical Institute

**ISBN: 0-8053-4852-2**

by Mary J. Stewart

- **An Essential Introductory Text Review of: Essential Cell Biology, 2nd ed., by Bruce Alberts, Dennis Bray, Karen Hopkin, Alexander Johnson, Julian Lewis, Martin Raff, Keith Roberts, and Peter Walter; Garland Science Group / Taylor and Francis Group; ISBN: 0-8153-3480-X**  
by Amanda Norvell
- **The Biological Justification for Transforming our Teaching Review of: *The Art of Changing the Brain: Enriching the Practice of Teaching by Exploring the Biology of Learning*, by James E. Zull; Stylus Publishing; ISBN: 1-5792-2054-1**  
by Dottie Engle

## ESSAY

---

- **Role of the Undergraduate Student Research Assistant in the New Millennium**  
by Thais Dutra Nascimento Silva, Lúcia Cristina da Cunha Aguiar, Jaqueline Leta, Dilvani Oliveira Santos, Fernanda Serpa Cardoso, Lúcio Mendes Cabral, Carlos Rangel Rodrigues, and Helena Carla Castro

## ARTICLES

---

- **Relational Databases: A Transparent Framework for Encouraging Biology Students To Think Informatively**  
by Michael Rice, William Gladstone, and Michael Weir
- **Students' Studying and Approaches**

**to Learning in Introductory Biology**  
by Debra Tomanek and Lisa Montplaisir

- **Computer Simulations Improve University Instructional Laboratories**  
by Nicola J. Gibbons, Chris Evans, Annette Payne, Kavita Shah, and Darren K. Griffin
- **Survey of Undergraduate Research Experiences (SURE): First Findings**  
by David Lopatto

## **ANNOUNCEMENTS**

---

September 3–7, 2005, Sydney, Australia  
**15th International Society of Developmental Biologists Congress**

### **Submit Your Manuscript**

Online Manuscript Submission

- **Instructions to Authors**
- **Top Ten Reasons to Publish in CBE**  
[pdf]

### **Other Information:**

There are **6,451** registered users signed up to receive quarterly notification of new content.

[Become a registered user.](#)

### **Order a Free CBE Poster**

*On the Cover* [\[Printable Cover\]](#)

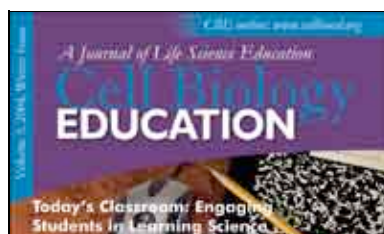

Biologists enjoy solving problems and answering questions, but the traditional biology

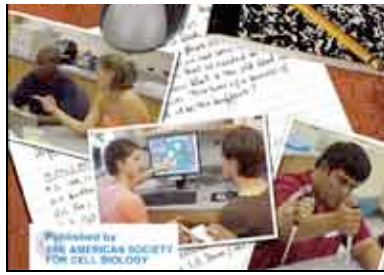

curriculum has relied too often on the repetition of established material, leading students to anticipate a “right answer” as they follow a prescribed laboratory procedure. Today, many students are learning to design and conduct their own experiments, interpret data, and present their findings at meetings. The cover graphically illustrates the exciting innovations in instruction and new research opportunities for students described by the *Features*, *Essays*, and *Articles* in this issue of *CBE*.
